# Supplementary material for: SVInterpreter: A Comprehensive Topologically Associated Domain-Based Clinical Outcome Prediction Tool for Balanced and Unbalanced Structural Variants
Source: Frontiers journal article supplement (doi:10.3389/fgene.2021.757170), 2021-12-01
Supplement: Table_1.PDF [file Table_1.PDF]

**Supplementary Table 1. Average TAD size by genome version and cell line or tissue**

| <b>Cell line/Tissue</b> | <b>Hg38 average TAD size (bp)</b> | <b>Hg19 average TAD size (bp)</b> |
|-------------------------|-----------------------------------|-----------------------------------|
| Consensus TADs          | 1,796,527                         | 1,786,131                         |
| IMR90                   | 858,229                           | 824,472                           |
| LCL (GM12878)           | 815,201                           | 835,946                           |
| hESC                    | 1,087,767                         | 1,058,135                         |
| A549                    | 1,405,466                         | 1,411,623                         |
| Aorta tissue            | 1,679,636                         | 1,690,650                         |
| Cortex tissue           | 1,736,794                         | 1,337,331                         |
| Bladder tissue          | 1,799,711                         | 1,672,068                         |
| Lung tissue             | 1,754,399                         | 1,435,346                         |
| HUVEC                   | 1,072,369                         | 923,778                           |
| K562                    | 842,166                           | 867,120                           |

This average TAD size values are used to define the regions to analyze on chromosome Y. For each chromosome Y breakpoint, the region to analyze will start at [breakpoint – (average TAD size/2)] and end at [breakpoint+(average TAD size/2)]
